# Supplementary material
Source: MDPI journal article supplement (https://www.mdpi.com/2073-4395/12/3/606)
Supplement: s1 [file s1]

# Supplement Data:

**Table S1:** Amplification of the NODc gene of 47 selected bacteria, isolated from root nodules of six genotypes of *Vicia faba*: S– Saber 02, L– Locale, BC– Bachar, BD– Badii, CH– Chourouk et N– Najeh. grown in three different soils. (+) positive result.

| Strain     | NODc gene amplification | Host Genotype | Strain    | NODc gene amplification | Host Genotype |
|------------|-------------------------|---------------|-----------|-------------------------|---------------|
| 2T1V2 C1'' | +                       | L             | 4T2V5 D   | +                       | N             |
| 1T2V4 B1'  | +                       | BD            | 4T2V3 A1  | +                       | BC            |
| 4T2V1 A    | +                       | S             | 4T1V4 A1  | +                       | BD            |
| 3T2V2 A2   | +                       | L             | 4T2V2 C   | +                       | L             |
| 3T1V2 D1   | +                       | L             | 3T2V4 E1  | +                       | BD            |
| 3T1V1 A2   | +                       | S             | 3T2V4 D1  | +                       | BD            |
| 4T1V6 C    | +                       | N             | 3T2V4 D2  | +                       | BD            |
| 2T1V4 A2   | +                       | BD            | 2T1V2 2   | +                       | L             |
| 3T2V6 B2   | +                       | N             | 1T2V4     | +                       | BD            |
| 3T2V1 A2   | +                       | S             | 1T2V3 B   | +                       | BC            |
| 4T1V6 B    | +                       | N             | 1T2V5 F1  | +                       | CH            |
| 1T2V6 D2   | +                       | N             | 1T1V4     | +                       | BD            |
| 3T1V1 A2'  | +                       | S             | 1T2V5 A1  | +                       | CH            |
| 2T1V2 B1'' | +                       | L             | 1T2V6 D1  | +                       | N             |
| 2T1V2 A1'' | +                       | L             | 1T1V4 A2  | +                       | BD            |
| 3T2V4 C1   | +                       | BD            | 1T2V5 A3  | +                       | CH            |
| 3T1V5 A1   | +                       | CH            | 1T1V4 B1' | +                       | BD            |
| 1T1V4 B'   | +                       | BD            | 1T2V3 A1  | +                       | BC            |
| 1T2V3 A2   | +                       | BC            | 1T2V4 E3  | +                       | BD            |
| 3T1V3 A1   | +                       | BC            | 1T2V4 A3  | +                       | BD            |
| 4T2V3 C1   | +                       | BC            | 1T1V1 A2  | +                       | S             |
| 4T1V3 B    | +                       | BC            | 2T1V2 2'  | +                       | L             |
| 1T2V6 B2   | +                       | N             | 4T2V1     | +                       | S             |
| 2T1V1 1'   | +                       | S             |           |                         |               |
